# Supplementary material for: Iodotyrosine deiodinase: a unique flavoprotein present in organisms of diverse phyla
Source: Royal Society of Chemistry journal article supplement (doi:10.1039/c3mb70398c), 2013-10-17
Supplement: c3mb70398c.pdf [file c3mb70398c.pdf]

## Supplemental Information for

### Iodotyrosine Deiodinase: A Unique Flavoprotein Present in Organisms of Diverse Phyla

Abhishek Phatarphekar,<sup>1</sup> Jennifer M. Buss<sup>2</sup> and Steven E. Rokita<sup>1</sup>

<sup>1</sup>From the Department of Chemistry, Johns Hopkins University, Baltimore, MD 21218

<sup>2</sup>Department of Chemistry and Biochemistry, University of Maryland,  
College Park, MD 20742 USA

**Table S1.** NCBI accession numbers for IYD homologs chosen for expression.

| IYD homolog                | Protein accession | Derived from Nucleotide/genome accession | Amino acids deleted <sup>a</sup> |
|----------------------------|-------------------|------------------------------------------|----------------------------------|
| Zebrafish (drIYD)          | XP_696511.1       | XM_691419.3                              | 2-39                             |
| Lancelet (bfIYD)           | XP_002610029.1    | XM_002609983.1                           | 2-34                             |
| Honeybee (amIYD)           | XP_397179.2       | XM_397179.4                              | 2-41                             |
| Daphnia (dpIYD)            | EFX90111.1        | GL732523.1 <sup>b,c</sup>                | none                             |
| Sea anemone (nvIYD)        | XP_001633169.1    | XM_001633119.1                           | none                             |
| Hydra (hmIYD) <sup>d</sup> | XP_002164528.1    | XM_002164492.1                           | none                             |
| Bacteria (hhIYD)           | YP_004447048.1    | CP002691.1 <sup>e</sup>                  | none                             |

<sup>a</sup>Amino acids predicted to act as the N-terminal membrane domain were removed to express soluble protein.

<sup>b</sup>Gene sequence is obtained by joining bases 2920261 to 2920660, 2920724 to 2920849, 2920912 to 2921102 and 2921161 to 2921346 of the *D. pulex* genome.

<sup>c</sup>Base at position 2920782 (base 459 of gene sequence) was changed from C to T making a silent mutation to remove XhoI site in native sequence.

<sup>d</sup>The protein and nucleotide sequences were recently superseded by XP\_002164528.2 and XM\_002164492.2 respectively after this investigation was completed. The updated protein sequence showed variation in the first 42 amino acids compared to the expressed protein sequence.

<sup>e</sup>Gene sequence is obtained by joining bases 2972330 to 2972998 of the *H. hydrossis* genome.

**Table S2.** Optimized conditions for expressing IYD homologs.

| IYD homolog         | IPTG added (μM) | Induction temp (°C) | Induction time (hrs) |
|---------------------|-----------------|---------------------|----------------------|
| Zebrafish (drIYD)   | 400             | 18                  | 4                    |
| Lancelet (bfIYD)    | 50              | 18                  | 12                   |
| Honeybee (amIYD)    | 400             | 18                  | 4                    |
| Daphnia (dpIYD)     | 50              | 16                  | 12                   |
| Sea anemone (nvIYD) | 400             | 18                  | 4                    |
| Hydra (hmIYD)       | 20              | 16                  | 12                   |
| Bacteria (hhIYD)    | 400             | 18                  | 4                    |

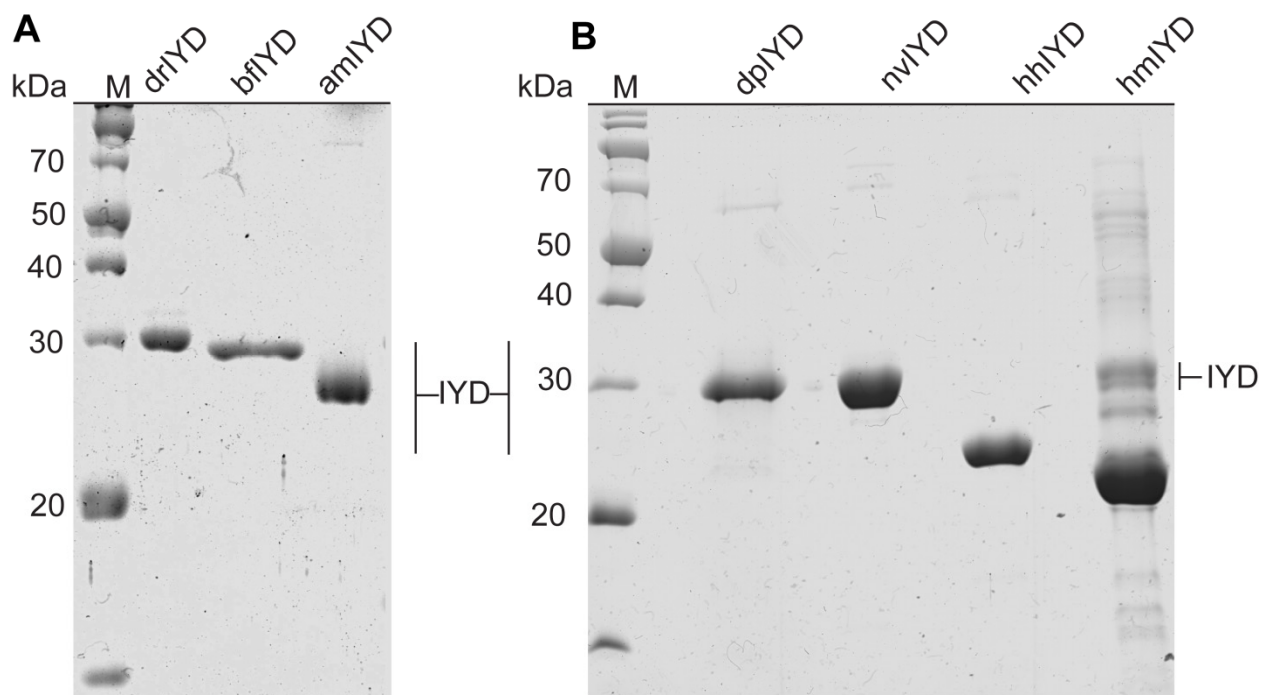

**Figure S1. SDS-PAGE gel images of purified IYD homologs.** A. IYD homologs from zebrafish (drIYD), lancelet (bfIYD) and honeybee (amIYD). B. IYD homologs from daphnia (dpIYD), sea anemone (nvIYD), hydra (hmIYD) and the bacteria *H. hydrossis* (hhIYD). M is the marker lane with molecular weights of protein markers indicated on the left in kDa.

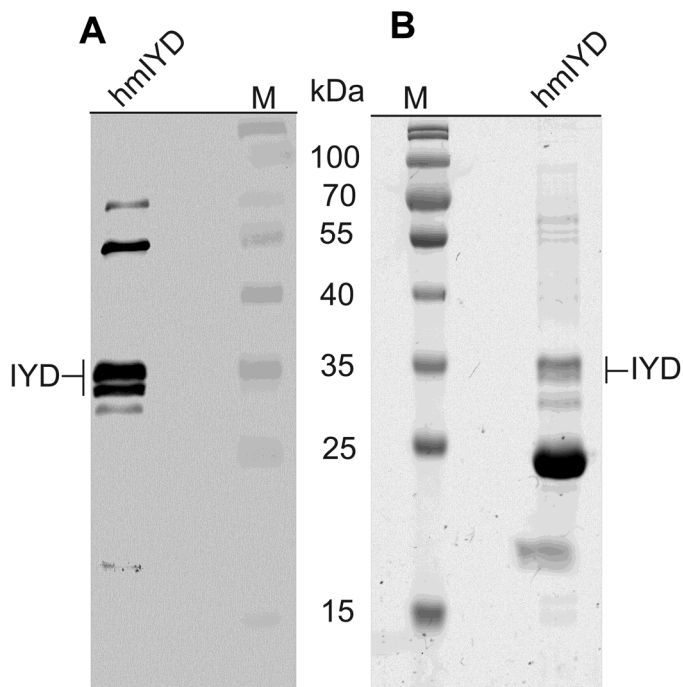

**Figure S2. Identification of active IYD from hydra (hmIYD).** A. Western blot of the active protein fraction from hmIYD purification was analysed by using a His-tag mouse monoclonal antibody and goat anti mouse antibody performed as per manufacturer procedures (Novagen). The 55 kDa band is the SUMO-hmIYD fusion which exhibited no deiodinase activity (data not shown). B. Coomassie stained SDS-PAGE image of same active protein fraction tested in panel A.

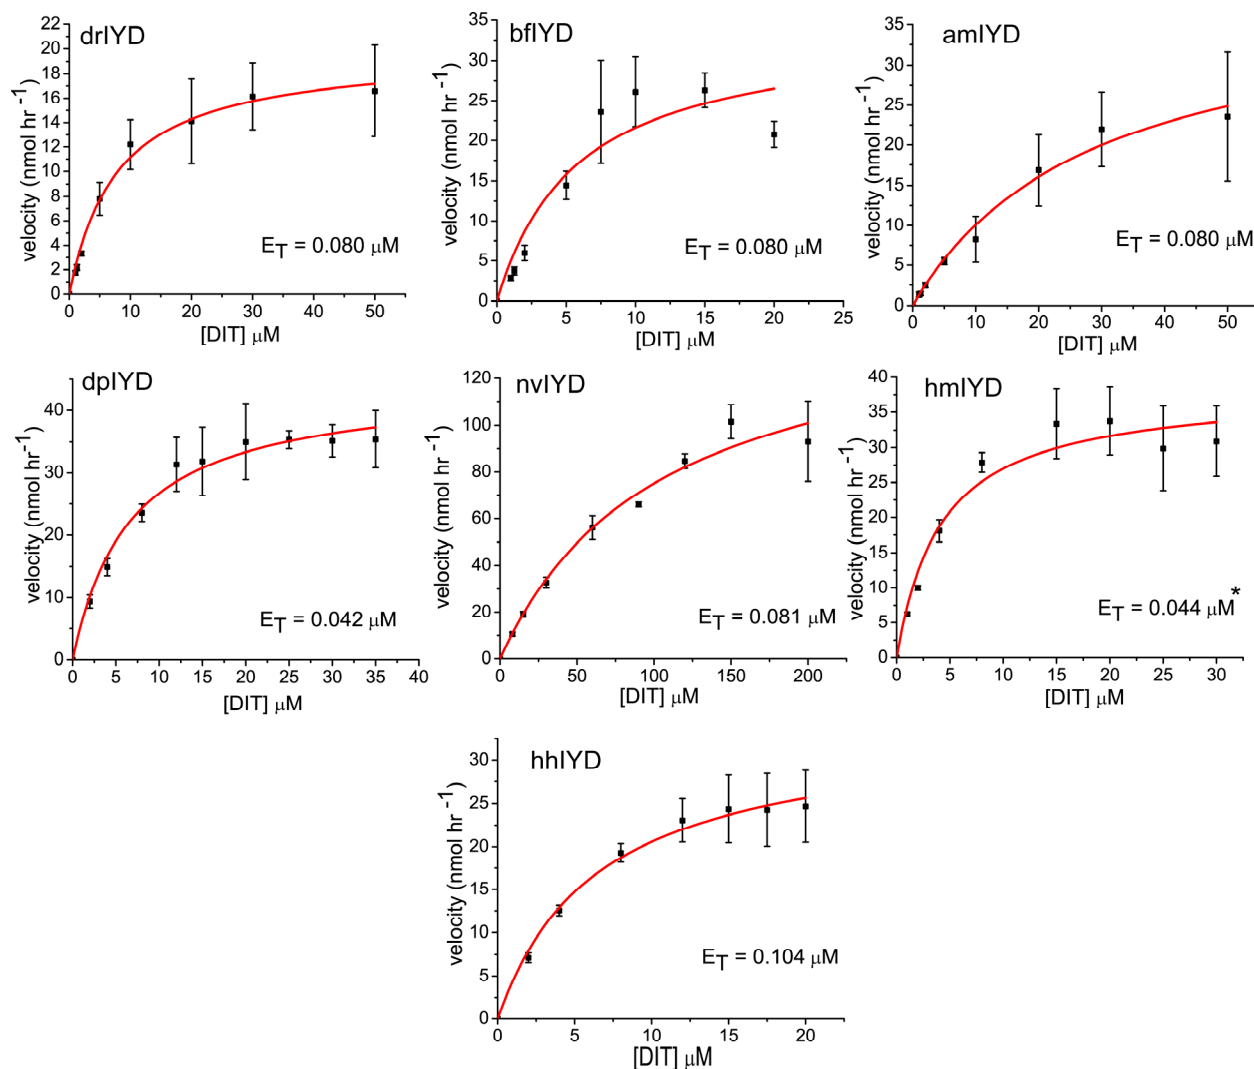

**Figure S3. Deiodination rate dependence on DIT concentration for IYD homologs.** Kinetic constants were determined by fitting initial rates to the Michealis-Menten equation (red curve) using Origin 7.0. Each data point represents an average of 3 individual observations, and the error bars represent their standard deviation.  $E_T$  indicates the total enzyme concentration used for each IYD homolog. Estimated enzyme concentration is indicated by (\*) (see experimental procedures).
